# Supplementary material
Source: publisher site journal article supplement (https://www.dovepress.com/article/340281)
Supplement: Supplementary file 1 [file get_supplementary_file.php]

## **SUPPLEMENTAL INFORMATION**

### **Therapeutic Potential of Vortioxetine for Anhedonia in Depression: A Post Hoc Analysis of Data From a Clinical Trial Conducted in Japan**

Koichiro Watanabe,<sup>1</sup> Shinji Fujimoto,<sup>2</sup> Tatsuro Marumoto,<sup>2</sup> Tadayuki Kitagawa,<sup>3</sup>  
Kazuyuki Ishida,<sup>3</sup> Tadashi Nakajima,<sup>2</sup> Yoshiya Moriguchi,<sup>4</sup> Keita Fujikawa,<sup>2</sup> Takeshi  
Inoue<sup>5</sup>

<sup>1</sup>Department of Neuropsychiatry, Kyorin University School of Medicine, Tokyo, Japan;

<sup>2</sup>Japan Medical Office, Takeda Pharmaceutical Co., Ltd, Tokyo, Japan; <sup>3</sup>Takeda  
Development Center – Japan, Takeda Pharmaceutical Co., Ltd, Osaka, Japan;

<sup>4</sup>Medical Affairs, Lundbeck Japan K.K., Tokyo, Japan; <sup>5</sup>Department of Psychiatry,  
Tokyo Medical University, Tokyo, Japan

**Correspondence:** Koichiro Watanabe

Department of Neuropsychiatry, Kyorin University School of Medicine, 6-20-2

Shinkawa, Mitaka, Tokyo 181-8611, Japan

Tel +81-422-47-5511

Fax +81-422-45-4697

Email [koichiro@tke.att.ne.jp](mailto:koichiro@tke.att.ne.jp)

ORCID ID: 0000-0002-0736-7070

**S1** List of Independent Ethics Committees (IECs)/Institutional Review Boards (IRBs).

ClinicalTrials.gov identifier for primary study: NCT02389816.

- Institutional Review Board of Medical Corporation Jisenkai Nankokorono Clinic
- Suzuki Internal & Circulatory Medical Clinic Institutional Review Board
- Institutional Review Board of Medical Corporation Jisenkai Ichigaya-Himorogi Clinic
- Sugiura Clinic Institutional Review Board
- Shin-Nihonbashi Ishii Clinic Institutional Review Board
- Sakayori Clinic Institutional Review Board
- Review Board of Human Rights and Ethics for Clinical Studies Institutional Review Board
- Adachi Kyouzai Hospital Institutional Review Board
- Japan Community Health-care Organization Tokyo Shinjuku Medical Center Institutional Review Board
- Yamate Dermatological Clinic Institutional Review Board
- Clinical Research Hospital Tokyo Institutional Review Board
- Mizuo Clinic Institutional Review Board
- Yoyogi Mental Clinic Institutional Review Board
- Haradoi Hospital Institutional Review Board
- Goshogatani Home Clinic Institutional Review Board
- Yuge Neuropsychiatric Hospital Institutional Review Board
- Sapporo Psychotropic Institutional Review Board
- National Hospital Organization Kanazawa Medical Center Institutional Review Board
- Japan Conference of Clinical Research Institutional Review Board
- Nishi Hospital Institutional Review Board
- Hanna Hospital Institutional Review Board
- Imazato Gastrointestinal Hospital Institutional Review Board
- Institutional Review Board of Non-profit organization Tokyo Allergy and Respiratory Disease Research Institute
- Kyorin University Hospital Institutional Review Board
- Akasaka Clinic Institutional Review Board
